# Supplementary material for: Frizzled-7-targeted delivery of zinc oxide nanoparticles to drug-resistant breast cancer cells
Source: Royal Society of Chemistry journal article supplement (doi:10.1039/c9nr01277j), 2019-01-01
Supplement: c9nr01277j1.pdf [file c9nr01277j1.pdf]

## SUPPLEMENTARY FIGURES

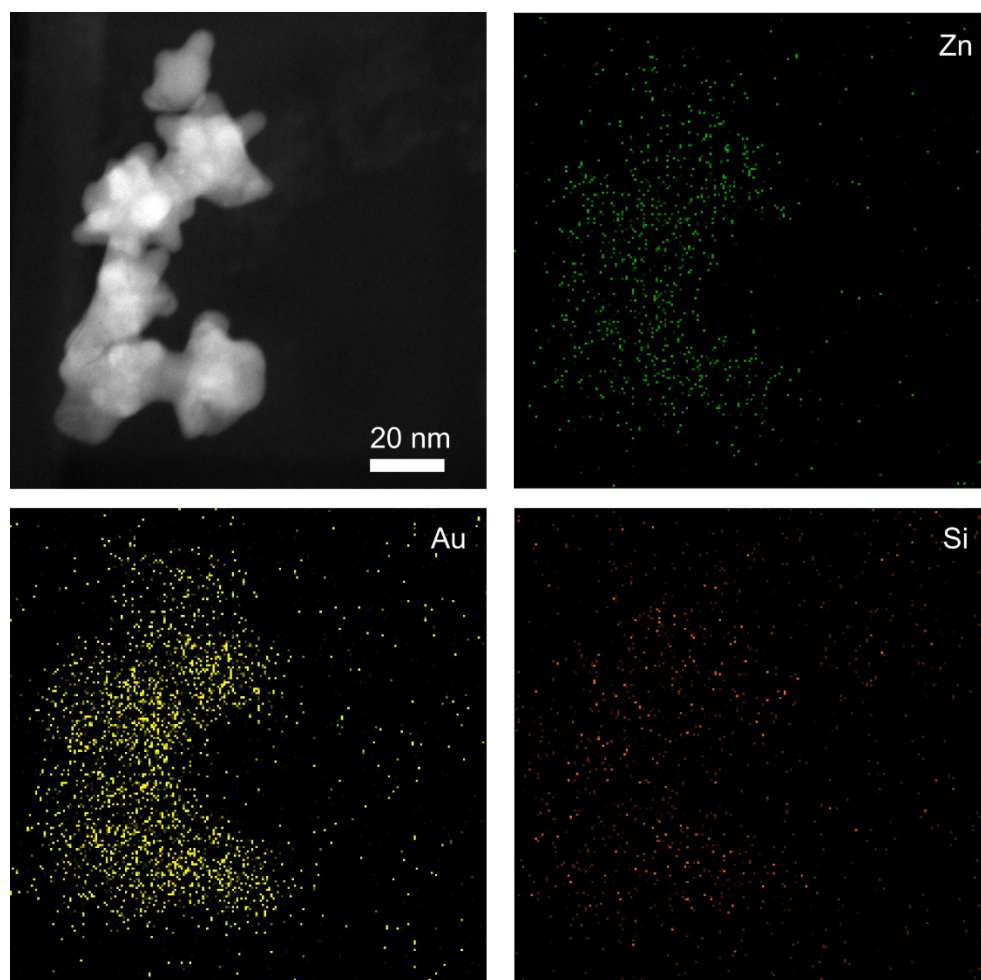

**Supplementary Figure 1.** ADF-STEM image and Zn, Au and Si EDX compositional maps of the MSN-ZnO-AuNSs in the vicinity of the CAL51 cells at 2 hours.

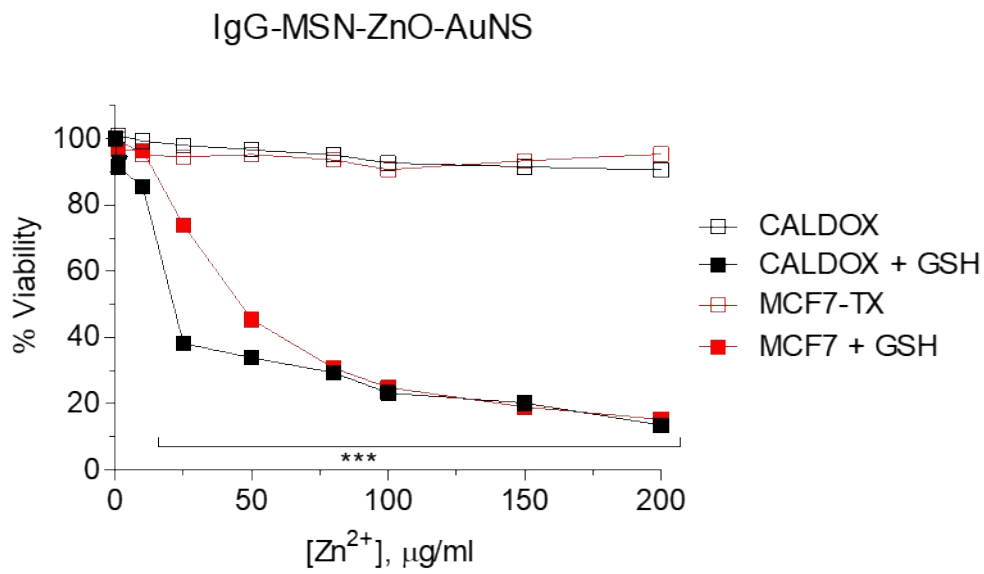

**Supplementary Figure 2.** GSH activates the release of zinc ions from the IgG-MSN-ZnO-AuNSs. In the presence of GSH, the IgG-S-S-conjugated MSN-ZnO-AuNSs reduce the viability of CALDOX and MCF7-TX cells in a dose-dependent manner (WST assay, 24 h treatment). Without GSH, the IgG-MSN-ZnO-AuNSs have no significant cytotoxic effect. \*\*\*  $p < 0.001$  vs. non-treated ( $[Zn^{2+}] = 0$ ) cells, one-way ANOVA. Mean $\pm$ SEM,  $n = 3$  independent experiments.
